# Supplementary material for: “What Would You Do?”: How Cat Owners Make End-of-Life Decisions and Implications for Veterinary-Client Interactions
Source: MDPI journal article supplement (doi:10.3390/ani11041114), 2021-04-13
Supplement: s1 [file s1]

# Retrospective Euthanasia Interviews

## OWNER INTERVIEW

| TOPIC (estimated time in minutes)<br><i>Keywords</i>                                     | QUESTIONS [AND PROMPTS]                                                                                                                                                                                                                                                                                                                                                                                                                                                                                                                                                                                                 |
|------------------------------------------------------------------------------------------|-------------------------------------------------------------------------------------------------------------------------------------------------------------------------------------------------------------------------------------------------------------------------------------------------------------------------------------------------------------------------------------------------------------------------------------------------------------------------------------------------------------------------------------------------------------------------------------------------------------------------|
| <b>Introduce Interviewer &amp; Research (10)</b><br><i>About interviewer and project</i> | Kat Littlewood, PhD Candidate at Massey University. Interview is part of PhD research.<br>We would like to find out how owners and their veterinarians are currently making EoL decisions.                                                                                                                                                                                                                                                                                                                                                                                                                              |
| <i>Outline of interview procedure</i>                                                    | I will first start off with some background questions.<br>Then I would like to discuss cats in general, before moving onto talking about your own experiences with your cat.<br>I would be happy to explain more after the interview.<br>I will ask number of questions - please answer what comes to mind. No right or wrong answers. Want to hear what you think.<br>I may take notes – so I don't interrupt you if something you say I would like to hear more about later in the interview.<br>If you think of something you think is important, but I don't ask about it, you are welcome to bring it up yourself. |
| <i>Opportunity to withdraw, break</i>                                                    | If I ask something you don't want to talk about, you can say you don't want to answer.<br>You can stop interview at any time.<br>If you need to take a break during the interview please say so.                                                                                                                                                                                                                                                                                                                                                                                                                        |
| <i>Written transcript, summary report</i>                                                | You will have an opportunity to view the written transcript and make any corrections if you wish.<br>This may take up to one hour of your time, and we would expect the revised transcript to be returned to us within two weeks of you receiving it.<br>If we do not hear from you within this two week period we will assume that you have given permission to include the interview in the analysis.<br>If, after reviewing the transcript, you are happy with it as it is you do not need to return it.<br>You will also receive a summary of the project findings when it is concluded.                            |
| <i>Consent</i>                                                                           | Information Sheet & questions.<br><b>Consent Form signed.</b><br>I would like to record interview – it will be transcribed afterwards, but your responses kept anonymous. OK to record interview? Can we begin?<br><b>Start recorders.</b>                                                                                                                                                                                                                                                                                                                                                                              |

**Probing questions:** 'Can you tell me a bit more about that?' 'What was that like?' 'Can I check, you said x happened; how did you feel about that?' 'Why do you say that?'

**Encouraging interesting material:** 'That's really interesting', 'Then what happened?' **LEARN TO WAIT IN THE FACE OF SILENCE**

| TOPIC (estimated time in minutes)<br><i>Keywords</i>                                                                                                                                                      | QUESTIONS [AND PROMPTS]                                                                                                                                                                                                                                                                                                                                                                                                                                                                                                                                                                                                                                                                                                                                                                                                                                                                                                                                     |
|-----------------------------------------------------------------------------------------------------------------------------------------------------------------------------------------------------------|-------------------------------------------------------------------------------------------------------------------------------------------------------------------------------------------------------------------------------------------------------------------------------------------------------------------------------------------------------------------------------------------------------------------------------------------------------------------------------------------------------------------------------------------------------------------------------------------------------------------------------------------------------------------------------------------------------------------------------------------------------------------------------------------------------------------------------------------------------------------------------------------------------------------------------------------------------------|
| <b>A: Warm up questions (2)</b><br><i>Experience with animals and children/family</i>                                                                                                                     | <b>What is your previous experience with animals?</b> <ul style="list-style-type: none"> <li>• Farm/livestock experience?</li> <li>• Have you always had a cat? How many?</li> <li>• Other pets/animals they have access to or experience with?</li> </ul> <b>Who is in your household?</b> <ul style="list-style-type: none"> <li>• Children? other animals?</li> </ul>                                                                                                                                                                                                                                                                                                                                                                                                                                                                                                                                                                                    |
| <b>B: Experiences with euthanasia and death. Expectations of longevity (2)</b>                                                                                                                            | <b>How long do you expect cats in general to live for?</b><br><b>What do you consider an ‘old cat’ to be?</b> <ul style="list-style-type: none"> <li>• How long did you expect your own cat to live for? [before/after diagnosis – if applies]</li> </ul> <b>Was this your first experience with putting a pet down?</b> <ul style="list-style-type: none"> <li>• Have you ever had to put a pet down before this?</li> </ul>                                                                                                                                                                                                                                                                                                                                                                                                                                                                                                                               |
| <b>C: About their cat (5)</b>                                                                                                                                                                             | <b>Tell me a few things about your cat [name of cat] – cat’s background</b> <ul style="list-style-type: none"> <li>• What was your cat’s name?</li> <li>• How old was s/he? [cats gender]</li> <li>• When did you get her/him? [duration of ownership]</li> <li>• Was s/he desexed/neutered?</li> </ul> <b>We are now going to focus on your <u>experiences</u> with your cat. Tell me about what was going on with your cat.</b> <ul style="list-style-type: none"> <li>• How did you find out s/he was ill? [or not doing so well]</li> <li>• Do you remember when you first considered the possibility of putting your cat to sleep?</li> </ul>                                                                                                                                                                                                                                                                                                          |
| <b>D: <u>Why</u> did owner decide to euthanase cat? (timing)</b> Overall factors involved in decision e.g. decline QoL, etc. Was there a major factor?<br><br>How did animal’s dx impact on owner’s life? | <b><u>Why</u> did you decide to put down your cat?</b> <ul style="list-style-type: none"> <li>• What <b>factors</b> involved in decision? – what was <b>most important factor</b>? Why?</li> <li>• How <b>long</b> did it take for your pet to go downhill? [Did you have to make a <b>quick EoL decision</b>? [why/why not]]</li> <li>• How <b>old</b> was s/he when you were given the diagnosis? Did the age of your cat factor into your decision?</li> <li>• How much were you expecting your cat’s treatment to <b>cost</b>? How much did the <b>cost</b> influence your decision?</li> <li>• What was a <b>typical day</b> like for you and your cat after s/he became ill or started to decline? How was it different?</li> <li>• Was there anything at home that you started to do differently or changed? How did you handle this?</li> <li>• Were there any <b>sacrifices made</b> by your or your family for your cat?</li> </ul> SECTION G NOW |
| <b>E: What was vet’s role in the EoL decision? (6)</b> <u>How</u> was EoL decision made?                                                                                                                  | <b>Who did you talk to about your decision? Whose advice did you seek?</b> <ul style="list-style-type: none"> <li>• Why did you ask this person?</li> <li>• Do you remember any <b>reactions from other people</b> to your cat’s illness or age?</li> </ul> <b>How important was your veterinarian’s advice in your decision-making?</b> <ul style="list-style-type: none"> <li>• What <b>options</b> were you given by your veterinarian? Did they change how you decided?</li> </ul>                                                                                                                                                                                                                                                                                                                                                                                                                                                                      |

**Probing questions:** ‘Can you tell me a bit more about that?’ ‘What was that like?’ ‘Can I check, you said x happened; how did you feel about that?’ ‘Why do you say that?’

**Encouraging interesting material:** ‘That’s really interesting’, ‘Then what happened?’ **LEARN TO WAIT IN THE FACE OF SILENCE**

| TOPIC (estimated time in minutes)<br><i>Keywords</i>                                                                                                                                                 | QUESTIONS [AND PROMPTS]                                                                                                                                                                                                                                                                                                                                                                                                                                                                                                                                                                                                                                                                                                                                                                                                                                                                                                                                                                                                                                  |
|------------------------------------------------------------------------------------------------------------------------------------------------------------------------------------------------------|----------------------------------------------------------------------------------------------------------------------------------------------------------------------------------------------------------------------------------------------------------------------------------------------------------------------------------------------------------------------------------------------------------------------------------------------------------------------------------------------------------------------------------------------------------------------------------------------------------------------------------------------------------------------------------------------------------------------------------------------------------------------------------------------------------------------------------------------------------------------------------------------------------------------------------------------------------------------------------------------------------------------------------------------------------|
| Who did they consult with to make this decision e.g. friends, family, internet groups, veterinarian                                                                                                  | <ul style="list-style-type: none"> <li>• What <b>role</b> did they have in your decision?</li> <li>• How <b>long</b> have you known your veterinarian/practice?</li> <li>• How much did your <b>relationship</b> with the veterinarian influence your decision?</li> <li>• Do you feel that your <b>vet agreed</b> with your decision?</li> </ul>                                                                                                                                                                                                                                                                                                                                                                                                                                                                                                                                                                                                                                                                                                        |
| <b>F: The euthanasia event (3.5)</b>                                                                                                                                                                 | <b>Can you tell me about the day that [cats name] died?</b> <ul style="list-style-type: none"> <li>• Tell me about the euthanasia event</li> <li>• How did you find the euthanasia process? Any positive experiences?</li> <li>• What was the decision-making experience like? What (if anything) could have helped to make that decision easier?</li> </ul>                                                                                                                                                                                                                                                                                                                                                                                                                                                                                                                                                                                                                                                                                             |
| <b>G: How did the owner assess QoL/welfare before and leading up to this decision? (4.5)</b> E.g. not eating, not drinking, not as active. Are they making these decisions based on QoL assessments? | <b>How did you decide on/evaluate how your cat was doing? (Its QoL/welfare)</b> <ul style="list-style-type: none"> <li>• What does <b>good QoL</b> for your cat mean to you? How did you assess your cats QoL?</li> <li>• What was the most important factor in your cat's QoL? [What did your cat enjoy? What was most important to him? Did this change? Did it affect decision?]</li> <li>• How would you rate your <b>cats QoL in the last 2 weeks before</b> you put him/her to sleep? Why do you say that?</li> <li>• How would you rate your <b>cats QoL in the last year before</b> you put him/her to sleep?</li> <li>• What were your expectations regarding your cat's <b>diagnosis [prognosis] or his/her age and their life expectancy?</b></li> </ul> <b>How did you discuss your cats QoL with your vet?</b> <ul style="list-style-type: none"> <li>• <b>When</b> did you start having these QoL discussions?</li> <li>• Did your vet give you any like things that might happen or any idea of <b>things to look out for?</b></li> </ul> |
| <b>H: How attached is the owner to their pet? (1)</b> Will attach affect answers?                                                                                                                    | <b>How close to your cat were you?</b> What makes you say this? <ul style="list-style-type: none"> <li>• How did other people (friends/family) react to the loss of your cat? Did they understand your loss?</li> </ul>                                                                                                                                                                                                                                                                                                                                                                                                                                                                                                                                                                                                                                                                                                                                                                                                                                  |
| <b>I: Expectations of veterinarian (1.5)</b>                                                                                                                                                         | <b>What were your expectations of your veterinarian in terms of managing animal euthanasia?</b> <ul style="list-style-type: none"> <li>• How much knowledge and experience would you expect them to have to perform euthanasia?</li> <li>• How important is it for vets to be taught EoL management (in vet schools)?</li> </ul>                                                                                                                                                                                                                                                                                                                                                                                                                                                                                                                                                                                                                                                                                                                         |
| <b>J: Ending on a positive note (1.5)</b>                                                                                                                                                            | <b>What would be a 'good' pet euthanasia for you?</b> What does it mean for an animal to have been put down 'well'?                                                                                                                                                                                                                                                                                                                                                                                                                                                                                                                                                                                                                                                                                                                                                                                                                                                                                                                                      |
| <b>K: Wrap Up</b><br><br><i>Possible additions, possible follow-up</i><br><br><i>Possible questions about the project</i><br><i>Difficult subject</i><br><i>Thanks</i>                               | <p>It seems like we're coming to the end of our discussion, but I just want to <b>check my notes...</b> ('Could you say a bit more about...')</p> <p>It seems we have covered main things I had in mind, but want to be sure you've told me everything you think I should know. Is there <b>anything you would like to add?</b> If you <b>remember something later</b>, please don't hesitate to contact me.</p> <p>Do you have any questions about the PhD project or the further processing of information you have provided? I understand this may have been difficult for you to talk about. <b>Are you going to be OK?</b></p> <p>You have been so helpful; I really appreciate the time you have taken to talk with me. Thank you very much.</p>                                                                                                                                                                                                                                                                                                   |

**Probing questions:** 'Can you tell me a bit more about that?' 'What was that like?' 'Can I check, you said x happened; how did you feel about that?' 'Why do you say that?'

**Encouraging interesting material:** 'That's really interesting', 'Then what happened?' **LEARN TO WAIT IN THE FACE OF SILENCE**
